# Supplementary material
Source: Springer Nature journal article supplement (https://www.springermedizin.de/resource/supplementary/12955_2008_480_MOESM1_ESM.pdf/9560544)

PHASE OF DEVELOPMENT

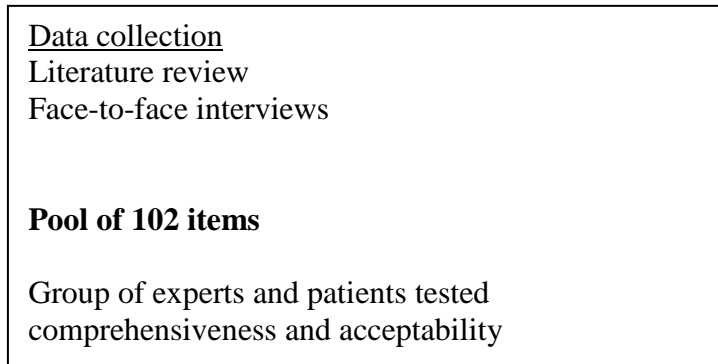

Subsample  
24 RTR

ITEM REDUCTION

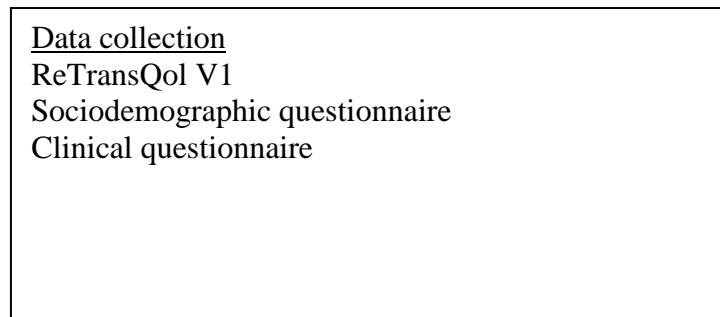

Subsample  
225 RTR

VALIDATION

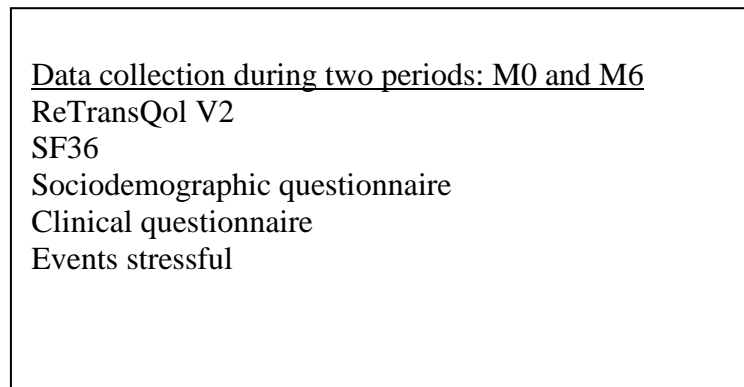

Subsample  
130 RTR

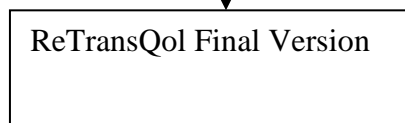

Supplement: MOESM1 [file 9560544]
